# Supplementary material for: Histone H2A Mono-Ubiquitination Is a Crucial Step to Mediate PRC1-Dependent Repression of Developmental Genes to Maintain ES Cell Identity
Source: PLOS journal article supplement (doi:10.1371/journal.pgen.1002774), 2012-07-26

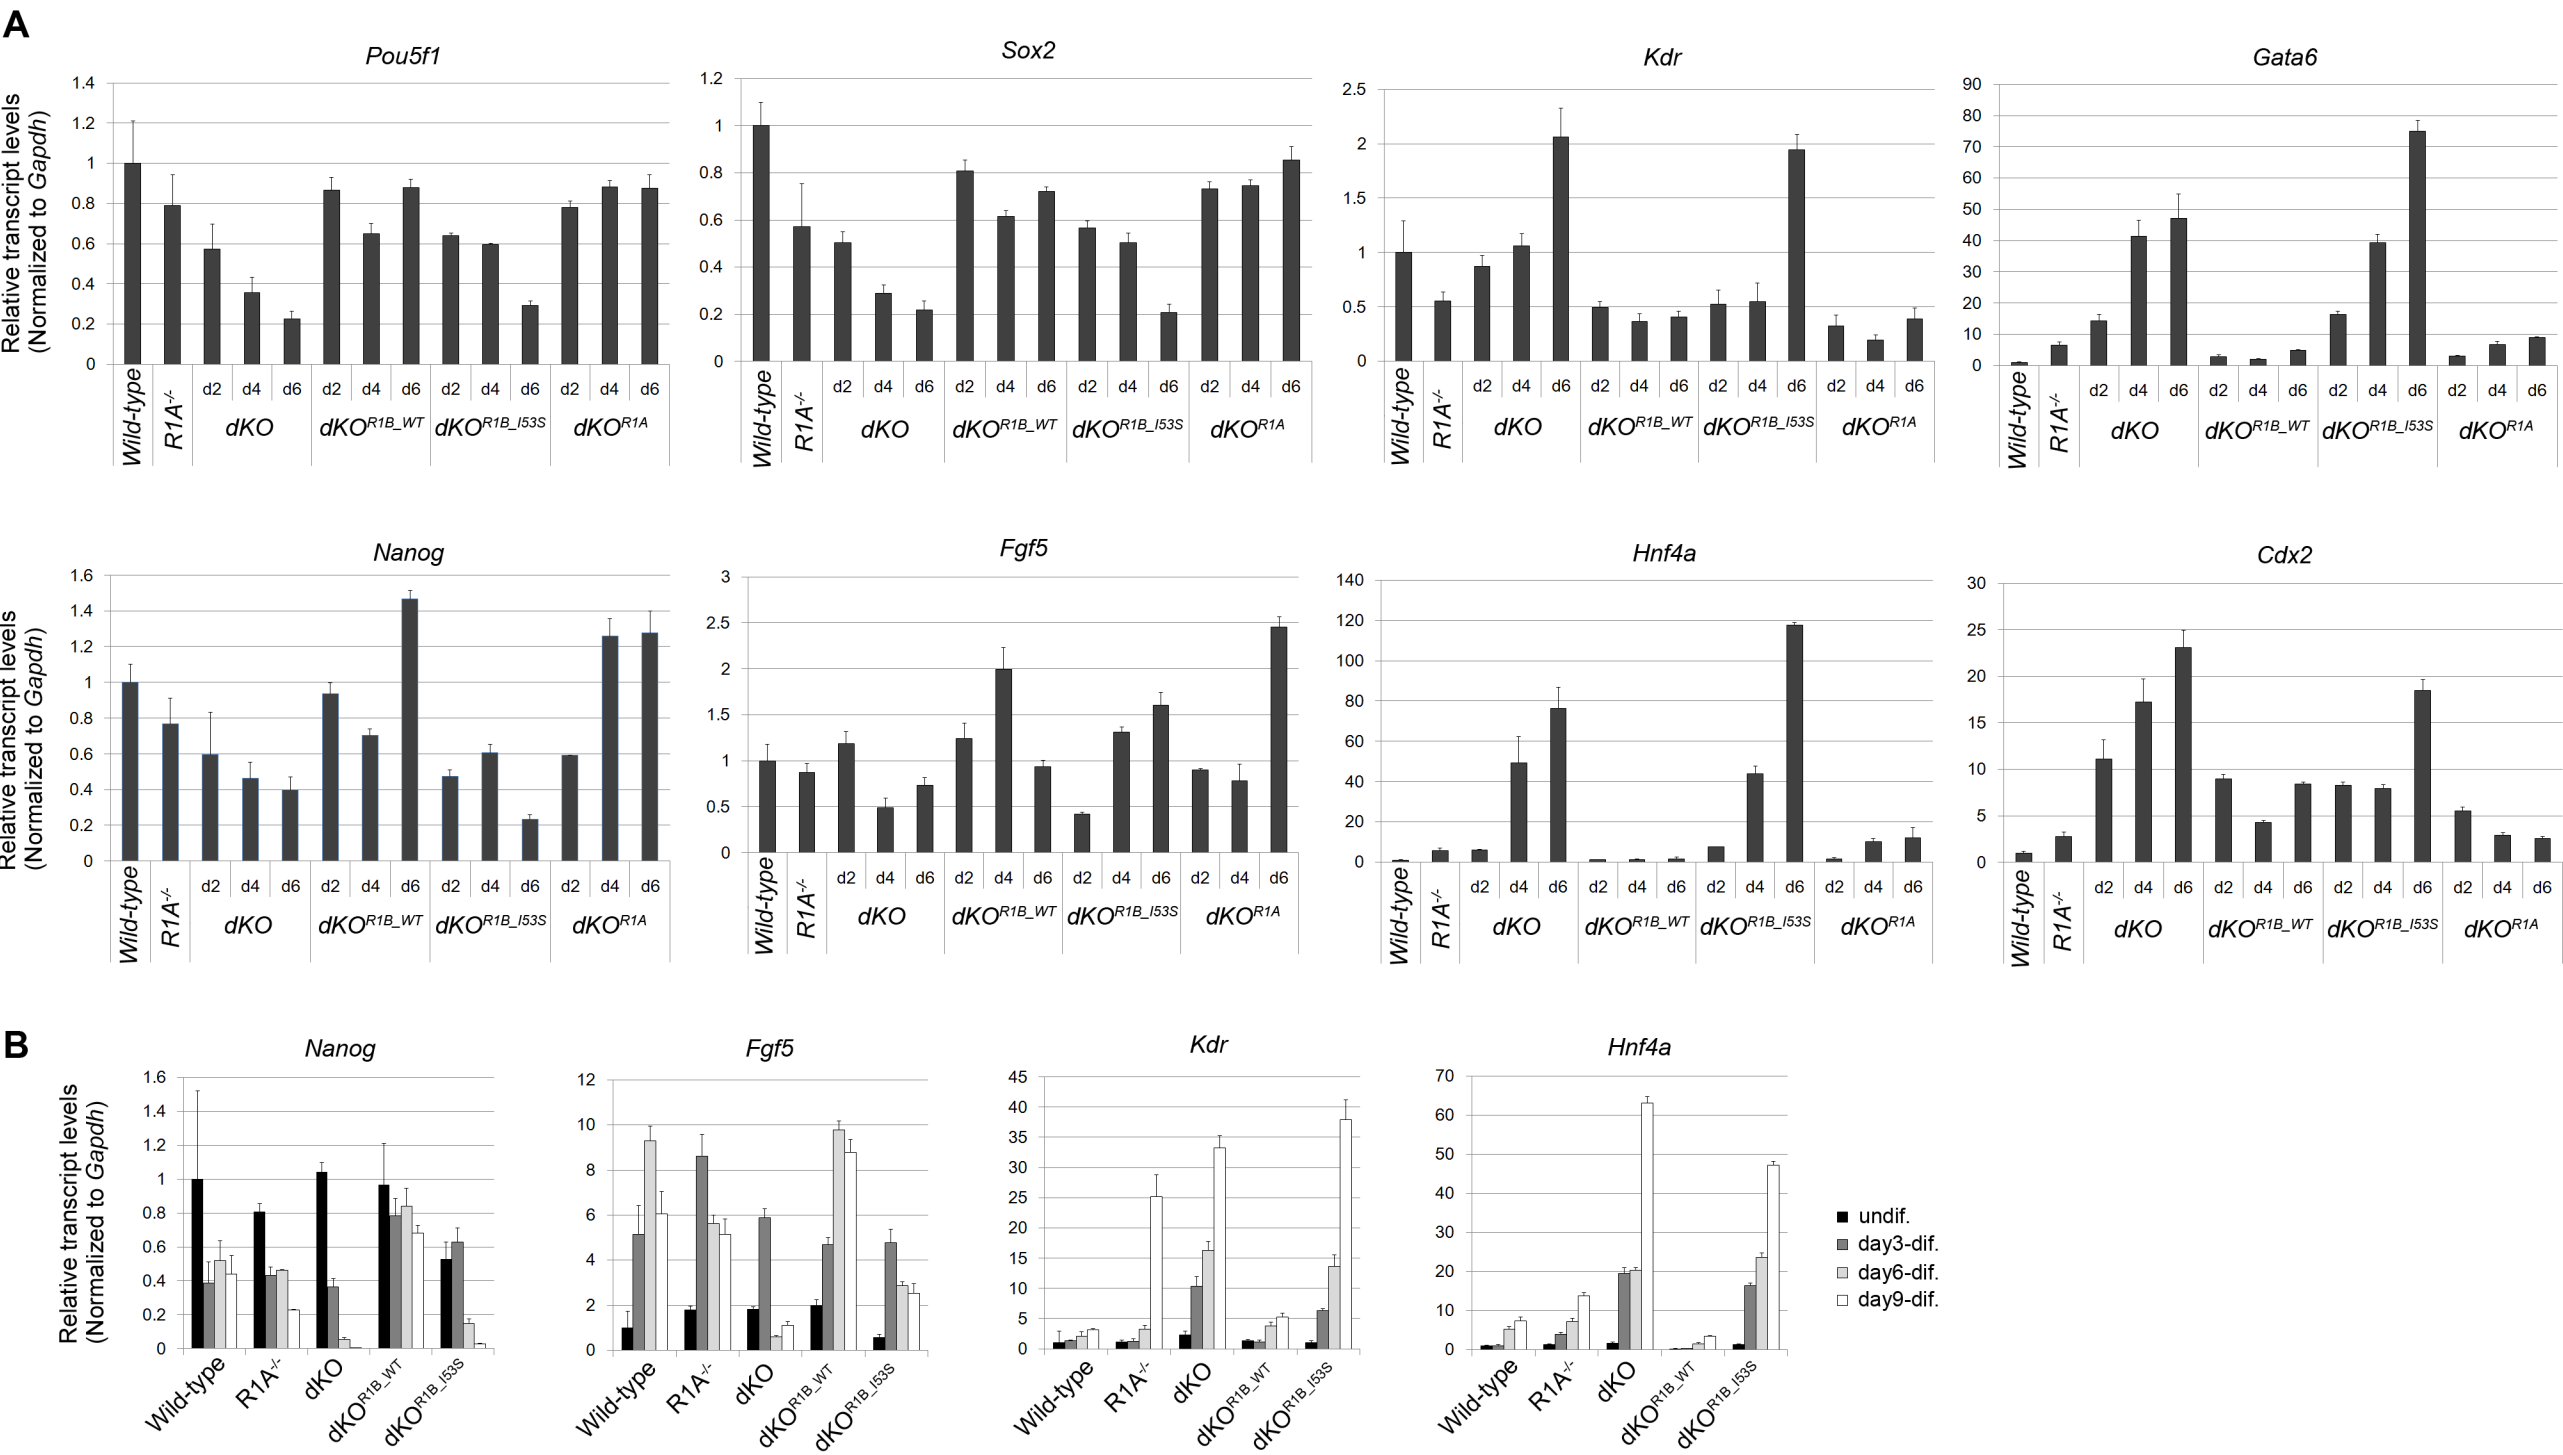

Supplement: S7 (10.1371/journal.pgen.1002774.s007) [file journal.pgen.1002774.s007]
